# Supplementary material for: A novel preparation of anti-layered poly(vinylalcohol)–polyacrylonitrile (PVA/PAN) membrane for air filtration by electrospinning
Source: Royal Society of Chemistry journal article supplement (doi:10.1039/c6ra13971j), 2016-01-01
Supplement: c6ra13971j1.pdf [file c6ra13971j1.pdf]

## A Novel Preparation of Anti-Layered Poly (vinyl alcohol)-Polyacrylonitrile (PVA/PAN) Membrane for Air filtration by Electrospinning

Zhiqiang Cheng,<sup>a,b,†</sup> Yingying Zhang,<sup>a,‡</sup> Zhaolian Han,<sup>a</sup> Liying Cui,<sup>a</sup> Lijuan Kang,<sup>a\*</sup> Fanli Zhang,<sup>a</sup>

*College of Resources and Environment, Jilin Agricultural University, Changchun 130118, People's Republic of China.*

*<sup>b</sup> School of Aerospace Engineering, Tsinghua University, Beijing, 100000, China*

\* Corresponding author E-mail: [kanglijuan\\_61@126.com](mailto:kanglijuan_61@126.com)

<sup>‡</sup> Yingying Zhang and Zhiqiang Cheng contributed to the work equally.

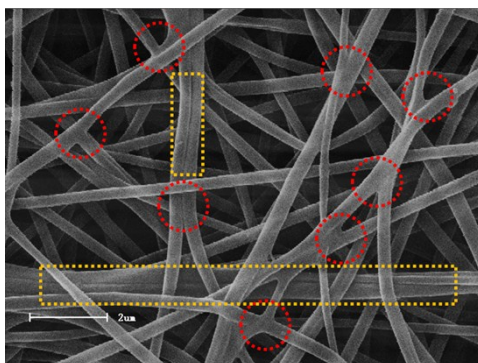

Fig. S1 The SEM of detailed plots of structure for cross-linked membrane

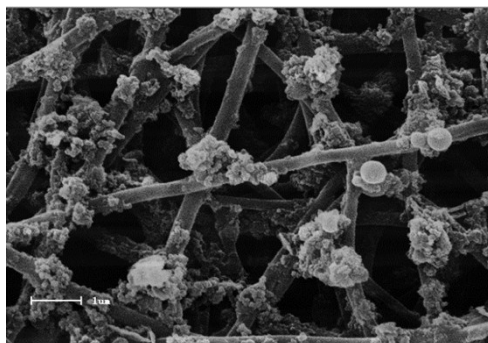

Fig. S2 The high magnification of morphology for intercepted particles on the membrane

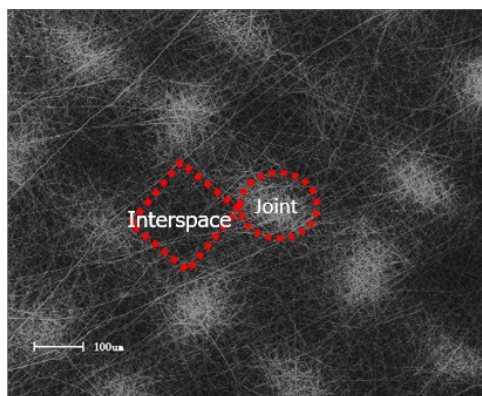

Fig. S3 The low magnification of SEM image for membrane collected on the modified SSM
